# Supplementary material for: Interplay of OpdP Porin and Chromosomal Carbapenemases in the Determination of Carbapenem Resistance/Susceptibility in Pseudomonas aeruginosa
Source: PubMed Central journal article supplement (PMC8557820; doi:10.1128/spectrum.01186-21), 2021-09-29
Supplement: reviewer-comments.pdf [file reviewer-comments.pdf]

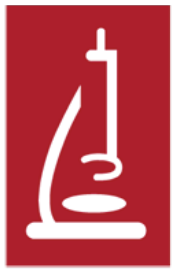

AMERICAN  
SOCIETY FOR  
MICROBIOLOGY

**Microbiology  
Spectrum**

# Interplay of OpdP porin and chromosomal carbapenemases in the determination of carbapenem resistance/susceptibility in *Pseudomonas aeruginosa*.

Jad Atrissi, Annalisa Milan, Raffaella Bressan, Marianna Lucafò, Vincenzo Petix, Marina Busetti, Lucilla Dolzani, and Cristina Lagatolla

*Corresponding Author(s): Cristina Lagatolla, University of Trieste*

---

## Review Timeline:

Submission Date:

August 12, 2021

Accepted:

August 23, 2021

---

*Editor: Ayush Kumar*

*Reviewer(s): The reviewers have opted to remain anonymous.*

## Transaction Report:

(Note: With the exception of the correction of typographical or spelling errors that could be a source of ambiguity, letters and reports are not edited. The original formatting of letters and referee reports may not be reflected in this compilation.)

**DOI: <https://doi.org/10.1128/Spectrum.01186-21>**

August 23, 2021

Dr. Cristina Lagatolla  
University of Trieste  
Life Sciences  
Via Fleming 22  
Trieste 34127  
Italy

Re: Spectrum01186-21 (**Interplay of OpdP porin and chromosomal carbapenemases in the determination of carbapenem resistance/susceptibility in *Pseudomonas aeruginosa*.**)

Dear Dr. Cristina Lagatolla:

I have reviewed the revised version of the manuscript that was initially submitted to AAC. I am satisfied by the changes you have made to the manuscript in response to the reviewers' comments from your previous submission. Thus, your manuscript has been accepted, and I am forwarding it to the ASM Journals Department for publication. You will be notified when your proofs are ready to be viewed.

The ASM Journals program strives for constant improvement in our submission and publication process. Please tell us how we can improve your experience by taking this quick [Author Survey](#).

As an open-access publication, Spectrum receives no financial support from paid subscriptions and depends on authors' prompt payment of publication fees as soon as their articles are accepted. You will be contacted separately about payment when the proofs are issued; please follow the instructions in that e-mail. Arrangements for payment must be made before your article is published. For a complete list of **Publication Fees**, including supplemental material costs, please visit our [website](#).

Corresponding authors may [join or renew ASM membership](#) to obtain discounts on publication fees. Need to upgrade your membership level? Please contact Customer Service at [Service@asmusa.org](mailto:Service@asmusa.org).

Thank you for submitting your paper to Spectrum.

Sincerely,

Ayush Kumar  
Editor, Microbiology Spectrum

Journals Department  
American Society for Microbiology  
1752 N St., NW  
Washington, DC 20036  
E-mail: [spectrum@asmusa.org](mailto:spectrum@asmusa.org)
